# Supplementary material
Source: PubMed Central journal article supplement (PMC1446967)

## SUPPLEMENTAL MATERIAL

### **Independent recruitment of Mediator and SAGA by the activator Met4**

Christophe Leroy, Laëtitia Cormier, and Laurent Kuras

FIG. 1. Mediator recruitment by Gal4 in SAGA mutants. Med14 (Rgr1), pol II and TBP association with *GALI* in cells lacking Gcn5 and Spt20 was measured by ChIP using IgG to immunoprecipitate Med14-TAP and antibodies to pol II CTD and Gal4 DNA-binding domain. Wild-type, *gcn5Δ* and *spt20Δ* cells (same strains as in figure 7A) were grown in YPD medium, collected, transferred to YPGal medium (at a density of  $0.2 \times 10^7$  cells/ml) and incubated for 2-3 cell divisions prior to formaldehyde addition. Immunoprecipitates (IP) were quantified using PCR primers for *GALI* UAS (Med14 and Gal4) and core promoter region (pol II) and *IME2* ORF as control. The histogram shows the results from one representative experiment. Similar results were obtained from several independent assays. Note that Med14 (Rgr1) and pol II association was less affected in the *gcn5Δ* mutant compared to the *spt20Δ* mutant. This result is in agreement with previous studies showing that Gcn5 and Spt20 are differentially required for SAGA activity at *GALI* (Bhaumik and Green, 2001; Larschan and Winston, 2001).

### Pol II

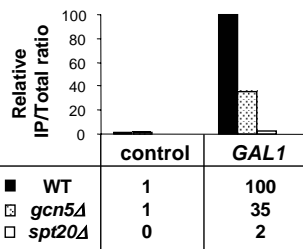

### Med14

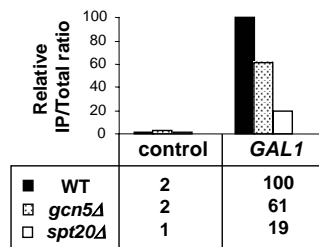

### Gal4

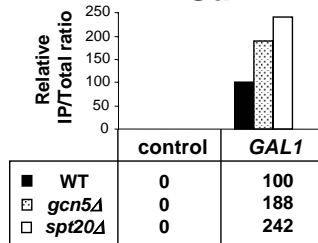

Supplement: molcellb_26_8_3149__1.pdf [file molcellb_26_8_3149__1.pdf]
